# Supplementary material for: Valuing the Multiple Benefits of Blue-Green Infrastructure for a Swedish Case Study: Contrasting the Economic Assessment Tools B£ST and TEEB
Source: Atypon-hosted journal article supplement (doi:10.1061/jswbay.0000919), 2020-06-18
Supplement: supplemental_materials_jswbay.0000919_hamann.pdf [file supplemental_materials_jswbay.0000919_hamann.pdf]

## SUPPLEMENTAL MATERIALS

*ASCE Journal of Sustainable Water in the Built Environment*

# Valuing the Multiple Benefits of Blue-Green Infrastructure for a Swedish Case Study: Contrasting the Economic Assessment Tools BEST and TEEB

Frieder Hamann, Godecke-Tobias Blecken, Richard M. Ashley,  
and Maria Viklander

**DOI:** 10.1061/JSWBAY.0000919

© ASCE 2020

[www.ascelibrary.org](http://www.ascelibrary.org)

6 ***A: Benefit categories in B&ST and TEEB***

7 **Supplementary Table S1 Categories and screening questions used to select monetised benefit categories for**  
 8 **assessment in B&ST (based on the B&ST technical guidance, cf. CIRIA 2016)**

| <b>Benefit category</b>         | <b>Question</b>                                                                                       |
|---------------------------------|-------------------------------------------------------------------------------------------------------|
| <b>Air quality</b>              | Will the scheme significantly change the level of air pollution?                                      |
| <b>Amenity</b>                  | Will the scheme change the attractiveness or desirability of the place?                               |
| <b>Biodiversity and ecology</b> | Will the scheme lead to a change in habitats for plants and animals?                                  |
| <b>Building temperature</b>     | Will the scheme change the potential for high temperatures in summer and cold temperatures in winter? |
| <b>Carbon sequestration</b>     | Will the scheme change the amount of carbon in the atmosphere?                                        |
| <b>Education</b>                | Will the scheme lead to greater awareness of water and surface water management?                      |
| <b>Enabling development</b>     | Will the scheme reduce demands on sewerage systems providing headroom for growth or development?      |
| <b>Flooding</b>                 | Will the scheme change the impact of flooding?                                                        |
| <b>Groundwater recharge</b>     | Will the drainage / SuDS also increase infiltration into the ground?                                  |
| <b>Health</b>                   | Will the drainage / SuDS also contribute to the health and wellbeing of local residents?              |
| <b>Pumping Wastewater</b>       | Will the scheme change the demands on pumping stations?                                               |
| <b>Rainwater harvesting</b>     | Will the scheme harvest water so that it can be put to other uses?                                    |
| <b>Recreation</b>               | Will the scheme change the facilities available for recreation and leisure?                           |
| <b>Treating wastewater</b>      | Will the scheme change the demands on sewage treatment works?                                         |
| <b>Water quality</b>            | Will the scheme change the water quality of rivers, lakes or the sea?                                 |

9

10

11  
 12 **Supplementary Table S2 Categories and screening questions used to select non-monetised benefit categories**  
 for 13 **assessment in B&ST (based on the B&ST technical guidance, cf. CIRIA 2016)**

| <b>Benefit category</b> | <b>Question</b>                                                                                          |
|-------------------------|----------------------------------------------------------------------------------------------------------|
| <b>Crime</b>            | Will the scheme change the local environment and thereby contribute to a reduction in crime?             |
| <b>Economic growth</b>  | Will the scheme unlock barriers to economic growth or provide new employment and business opportunities? |
| <b>Tourism</b>          | Will the scheme contribute to increased tourism in the area?                                             |
| <b>Traffic calming</b>  | Will the scheme enable traffic calming measures to be introduced?                                        |

14  
 15  
 16  
 17 **Supplementary Table S3 Categories and sub-categories for assessment in the TEEB-urban**  
 tool 18 **(cf. <https://www.teebstad.nl/>)**

| <b>Benefit category</b>       | <b>Sub-categories</b>                                                                                          |
|-------------------------------|----------------------------------------------------------------------------------------------------------------|
| <b>Health</b>                 | A greener environment; Improved air quality                                                                    |
| <b>Energy</b>                 | Saving energy through windshelter; Saving energy through insulation (green roofs)                              |
| <b>Value of property</b>      | Property price increase for existing homes; property price increase for new homes                              |
| <b>Recreation and leisure</b> | More leisure due to new or improved green space; More profit for businesses due to more attractive environment |
| <b>Social cohesion</b>        | Improved social cohesion                                                                                       |
| <b>Water management</b>       | Reduced flood risk; Lower sewage treatment costs due to less stormwater in combined sewer system               |

19  
 20

21 ***B: Results with the Forest baseline as reference***

22 **Supplementary Table S4 Distribution of the benefits and disbenefits obtained with B&ST and TEEB for the**  
 23 **three development options (\*\*proportion of the total benefits (positive values) or disbenefits (negative values)**  
 24 **in %)**

| <b>Benefit category</b>  | <b>Value (traditional drainage): € (%)**</b> |              | <b>Value (proposed plan): € (%)**</b> |              | <b>Value (extended BGI): € (%)**</b> |              |
|--------------------------|----------------------------------------------|--------------|---------------------------------------|--------------|--------------------------------------|--------------|
| <b>B&amp;ST</b>          |                                              |              |                                       |              |                                      |              |
| Groundwater recharge     | - 7 000                                      | (- 0.1)      | - 7 000                               | (< - 0.1)    | - 7 000                              | (< - 0.1)    |
| Building temperature     | 0                                            | (0)          | 0                                     | (0)          | 99 000                               | (0.6)        |
| Carbon sequestration     | - 2 593 000                                  | (- 32.5)     | - 2 576 000                           | (- 16.9)     | - 2 545 000                          | (- 14.9)     |
| Flooding                 | - 11 000                                     | (- 0.1)      | - 11 000                              | (- 0.1)      | 0                                    | (0)          |
| Water quality            | 136 000                                      | (1.7)        | 167 000                               | (1.1)        | 167 000                              | (1.0)        |
| Amenity                  | 3 596 000                                    | (45.1)       | 4 574 000                             | (30.0)       | 4 583 000                            | (26.8)       |
| Education                | 0                                            | (0)          | 3 000                                 | (< - 0.1)    | 3 000                                | (< - 0.1)    |
| Health                   | 7 053 000                                    | (88.5)       | 13 267 000                            | (86.9)       | 14 947 000                           | (87.4)       |
| Recreation               | - 21 000                                     | (- 0.3)      | - 21 000                              | (- 0.1)      | - 21 000                             | (- 0.1)      |
| Biodiversity and ecology | - 181 000                                    | (- 2.3)      | - 133 000                             | (- 0.9)      | - 132 000                            | (- 0.8)      |
| <b>Total</b>             | <b>7 973 000</b>                             | <b>(100)</b> | <b>15 263 000</b>                     | <b>(100)</b> | <b>17 094 000</b>                    | <b>(100)</b> |
| <b>TEEB</b>              |                                              |              |                                       |              |                                      |              |
| Energy                   | 27 000                                       | (0.1)        | 63 000                                | (0.3)        | 168 000                              | (0.7)        |
| Value of homes           | 20 690 000                                   | (97.3)       | 21 192 000                            | (92.9)       | 21 192 000                           | (91.0)       |
| Health                   | - 1 980 000                                  | (- 9.3)      | - 1 708 000                           | (- 7.5)      | - 1 339 000                          | (- 5.8)      |
| Recreation               | - 206 000                                    | (- 1.0)      | - 206 000                             | (- 0.9)      | - 206 000                            | (- 0.9)      |
| Social cohesion          | 2 733 000                                    | (12.9)       | 3 462 000                             | (15.2)       | 3 462 000                            | (15.0)       |
| <b>Total</b>             | <b>21 264 000</b>                            | <b>(100)</b> | <b>22 803 000</b>                     | <b>(100)</b> | <b>23 277 000</b>                    | <b>(100)</b> |

25

26

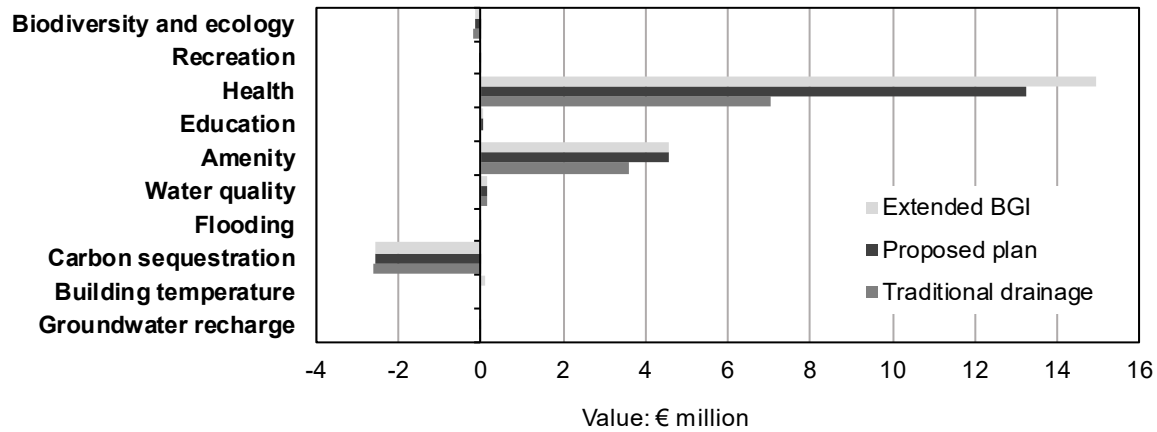

27

28 **Supplementary Figure S1 Distribution of the benefits for the three options using B&ST**

29

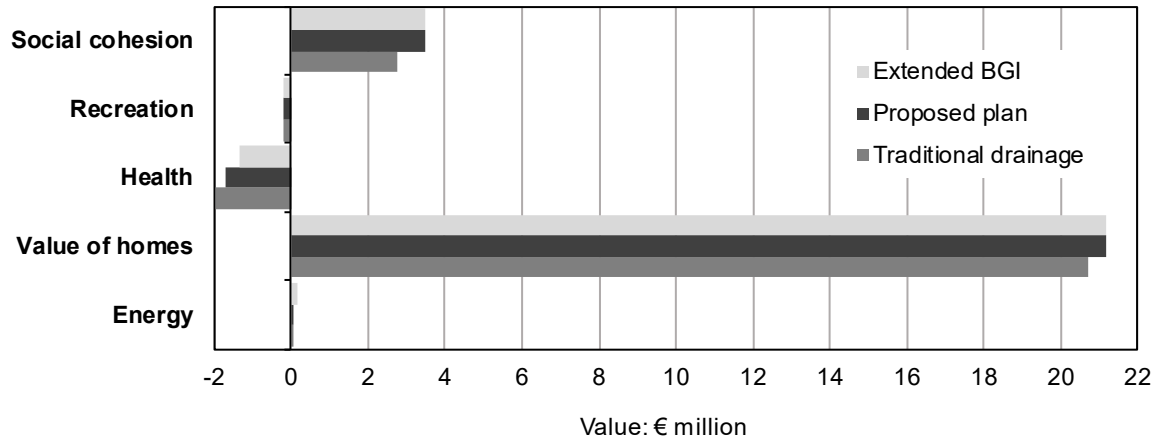

30

31 **Supplementary Figure S2 Distribution of the benefits for the three options using TEEB**

32

33 ***C: Reference***

34 CIRIA. 2016. "BeST (Benefits of SuDs Tool) Technical Guidance  
 35 Release Version 3." CIRIA, London, UK W045c RP993. 2016.  
 36 <https://www.susdrain.org/resources/best.html>.
